# Supplementary material for: Temperature-Sensitive Gold Nanoparticle-Coated Pluronic-PLL Nanoparticles for Drug Delivery and Chemo-Photothermal Therapy
Source: PubMed Central journal article supplement — Theranostics. 2017 Oct 6;7(18):4424–44. doi: 10.7150/thno.18832 (PMC5695141; doi:10.7150/thno.18832), 2017-10-06
Supplement: thnov07p4424s1.pdf [file thnov07p4424s1.pdf]

## Supporting Information

*Temperature-Sensitive Gold Nanoparticle-Coated Pluronic-PLL  
Nanoparticles for Drug Delivery and Chemo-Photothermal Therapy*

*Ying Sun<sup>1,†</sup>, Qi Wang<sup>1,†</sup>, Jianhua Chen<sup>1</sup>, Lei Liu<sup>1</sup>, Li Ding<sup>1</sup>, Ming Shen<sup>1</sup>, Jin Li<sup>\*3</sup>,*

*Baoshan Han<sup>\*2</sup> and Yourong Duan<sup>\*1</sup>*

<sup>1</sup> State Key Laboratory of Oncogenes and Related Genes, Shanghai Cancer Institute,  
Renji Hospital, School of Medicine, Shanghai Jiao Tong University, Shanghai  
200032, People's Republic of China

<sup>2</sup> Department of General Surgery, School of Medicine, Xinhua Hospital, Shanghai  
Jiao Tong University, Shanghai 200092, People's Republic of China

<sup>3</sup> Department of Ophthalmology, Renji Hospital, School of Medicine, Shanghai Jiao  
Tong University, Shanghai 200127, People's Republic of China

† These authors contributed equally to this work.

\* Corresponding author. Tel.: +86 21 64437139; fax: +86 21 64437139. E-mail:

yrduan@shsci.org (Y. Duan). Tel.: +86 21 25078999; fax: +86 21 25078999. E-mail:

hanbaosan@126.com (B. Han). Tel.: +86 21 63672937; fax: +86 21 63730455.

E-mail: lijnmpa@163.com (J. Li).

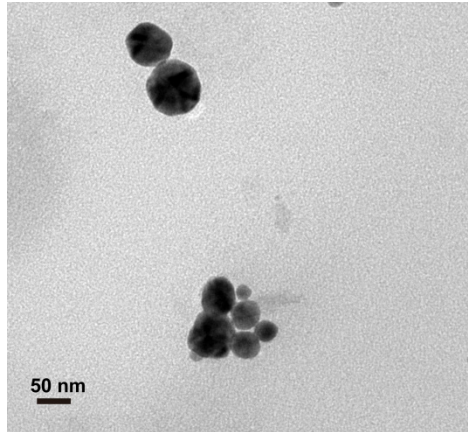

Figure S1. TEM image of Pluronic-PLL@Au NPs after laser irradiation for 2 min.

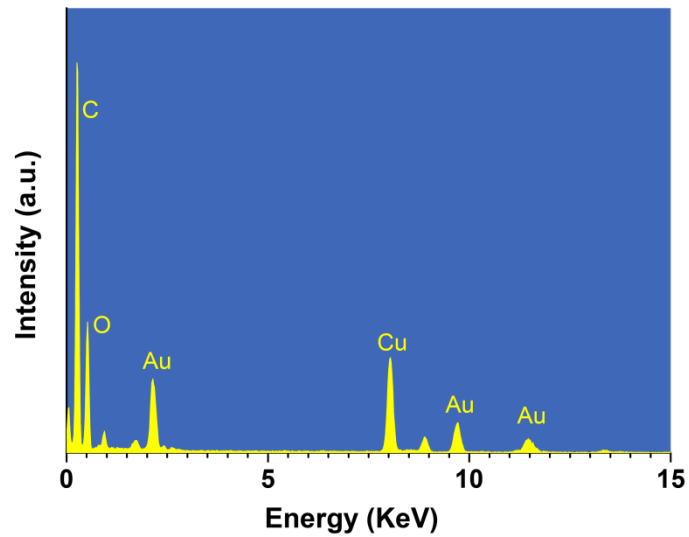

Figure S2. EDS result of Pluronic-PLL@Au NPs.

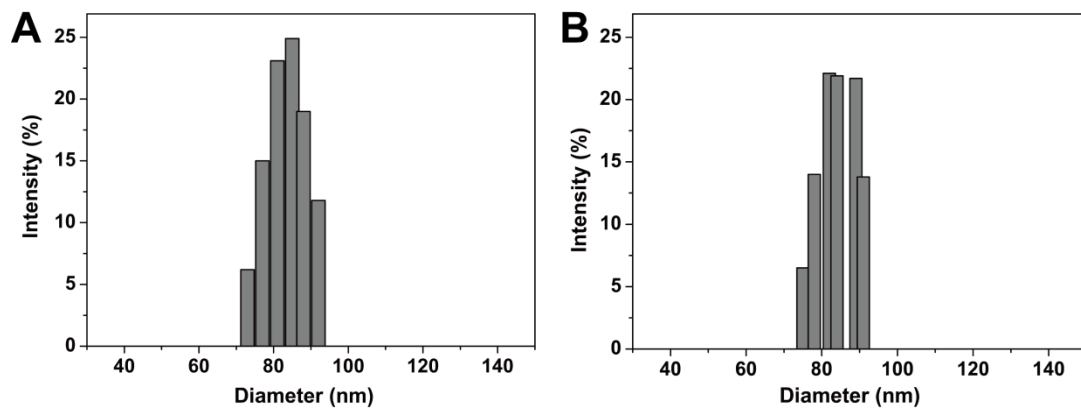

Figure S3. Size distribution of Pluronic-PLL@Au nanoparticles. (A) without laser irradiation, (B) after laser irradiation (808 nm, 1 W/cm<sup>2</sup>, 2 min). The measurement was carried out at 20 °C.

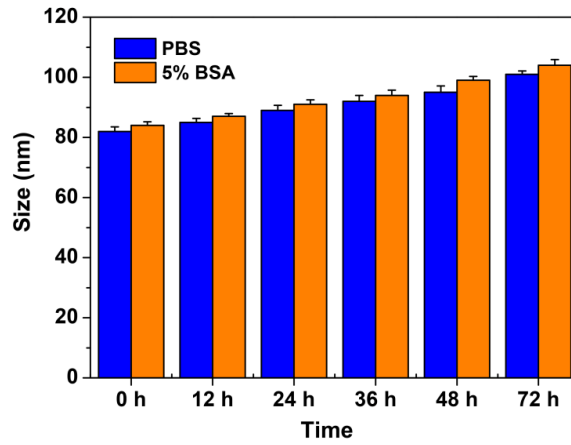

Figure S4. Particle size of Pluronic-PLL@Au nanoparticles incubated with PBS or 5% BSA for different time.

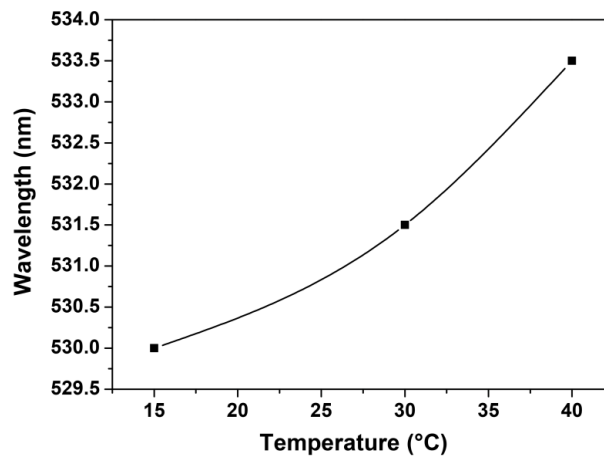

Figure S5. The wavelength of the SPR peak of Pluronic-PLL@Au nanoparticles (prepared for 0.5 h) as a function of solution temperature.

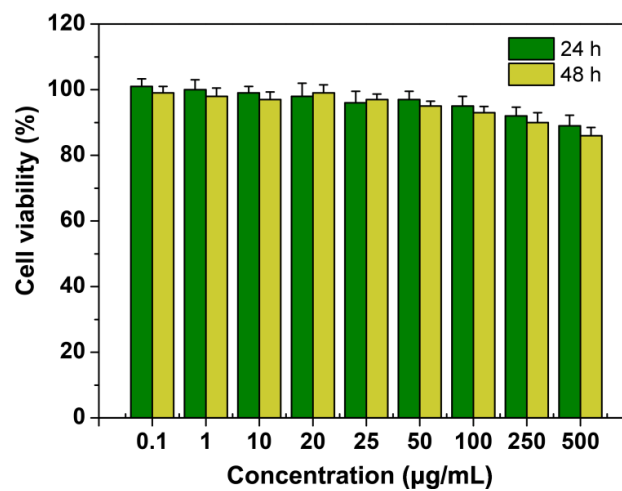

Figure S6. Cell viability of mouse fibroblasts L-929 cells against Pluronic-PLL@Au nanoparticles after being cultured for 24 h and 48 h with different concentrations.

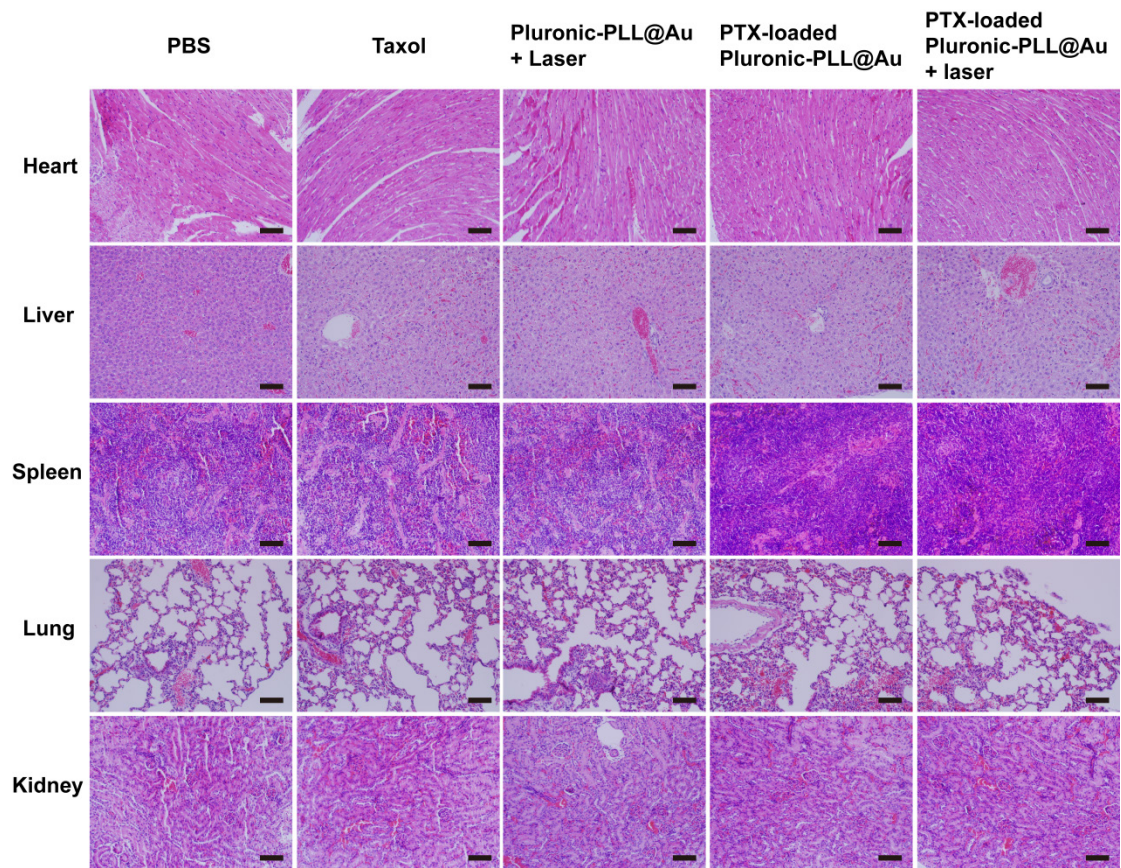

Figure S7. Images of H&E-stained organs from the MDA-MB-231 tumor bearing mice with different treatment (scale bar = 100  $\mu$ m).
